# Supplementary material for: Biological metasurfaces based on tailored Luria Bertani Agar growth medium formulations for photonic applications
Source: Royal Society of Chemistry journal article supplement (doi:10.1039/d4mh00861h), 2024-10-29
Supplement: d4mh00861h1.pdf [file d4mh00861h1.pdf]

## Supplementary information

### Biological metasurfaces based on tailored LBA growth medium formulations for photonic applications

Francesca Leone,<sup>a,b</sup> Olga Favale,<sup>a,b</sup> Mauro Daniel Luigi Bruno,<sup>a,b</sup> Roberto Bartolino,<sup>b</sup> Ferdinanda Annesi<sup>\*,b</sup>

Vincenzo Caligiuri,<sup>\*,a,b,c,d</sup> and Antonio De Luca<sup>\*,a,b</sup>

*a. Department of Physics, University of Calabria, via P. Bucci 31c, 87036, Rende (CS), Italy.*

*b. CNR Nanotec UOS Rende, via P. Bucci, 31c, 87036, Rende (CS), Italy.*

*c. Optoelectronics, Istituto Italiano di Tecnologia, via Morego 30, Genova, 16163, Italy.*

*d. LASCAMM - CR INSTM, Unità INSTM of Calabria Dipartimento di Chimica e Tecnologie Chimiche, Università della Calabria, via P. Bucci Cubo 14C, Arcavacata di Rende (CS), 87036 Italy*

## Section 1 - Colony Forming Units method:

Bacterial growth was evaluated in three different Luria Bertani Agar formulations, LBA, LB<sub>2</sub>A, and LB<sub>4</sub>A, in order to analyze the effect of nutrient composition on cell replication. We consider the bacterial cells in the exponential growth phase, i.e, a condition in which all cells have a similar shape and where their number double in a constant time interval. During this phase, we have found that both the cell concentration and growth rate are different for the three formulations, despite the similar initial cells concentration (see **Figure 2b,c** in Results and Discussion section of the main text). In this way, it is possible to compare the growth capacity of each formulation by evaluating the generation number  $n$  through the following relation:

$$N = N_0 2^n \quad [1]$$

Here  $N$  is the cells concentration after a certain growth time,  $N_0$  is the initial cells concentration and  $n$  represents the generation number used to obtain a final population  $N$ . Expressed in terms of  $n$  (see **Equation 2**), the generation time “g”, also known as the “doubling time”, can be assessed as  $g = \text{Time}/n$ . It describes the period required to give rise to two daughter cells from one. Other important parameters can be used to describe the growth dynamics for each formulation: (i) the growth rate ( $K = 1/g = n/\text{Time}$ ), indicating the generations number produced in a hour and (ii) the instantaneous rate constant  $k = \log(2)/g$ , expressing the rate at which the population is growing at any instant ( $K$  and  $k$  are expressed in units of reciprocal hours ( $\text{h}^{-1}$ ), see **Table 1**).

$$n = \frac{\log(N) - \log(N_0)}{\log(2)} \quad [2]$$

The doubling times and instantaneous growth rates were found to be significantly different for the three formulations. The doubling time for *E. coli* bacteria has been determined to be about 15 minutes in LBA, 17 minutes in LB<sub>2</sub>A and 34 minutes in LB<sub>4</sub>A. The higher instantaneous growth rate ( $k$ ) observed in LBA indicates a faster cells replication compared to LB<sub>2</sub>A and LB<sub>4</sub>A, for which growth

rates are lower. Although the nutritional components are in smaller quantities and the doubling time becomes longer compared to a standard LBA, it is possible to obtain a significant number of cells even for LB<sub>4</sub>A.

**Table 1:** Evaluation of  $n$ ,  $g$ ,  $K$  and  $k$  values for *E. coli* bacteria in LBA, LB<sub>2</sub>A and LB<sub>4</sub>A.

|                        | <b>LBA</b> | <b>LB<sub>2</sub>A</b> | <b>LB<sub>4</sub>A</b> |
|------------------------|------------|------------------------|------------------------|
| Log ( $N_0$ )          | 7.21       | 7.07                   | 7.57                   |
| Log ( $N$ )            | 13.14      | 12.34                  | 10.18                  |
| $n$                    | 19.69      | 17.54                  | 8.68                   |
| $g$ (minutes)          | 15'23"     | 17'10"                 | 34'55"                 |
| $K$ (generation/h)     | 3.94       | 3.51                   | 1.74                   |
| $k$ (h <sup>-1</sup> ) | 2.73       | 2.43                   | 1.20                   |

## Section 2 – Scattering contribution of each single nutrient of the LB<sub>4</sub>A formulation

Even though separating the contribution of each single component to the overall scattering is not a simple task to achieve, useful insight can be, however, gained by investigating the extinction coefficient of films containing only one of the nutritive components (Tryptone, Yeast Extract and NaCl) based on the LB<sub>4</sub>A formulation. The measurements (**Figure S1**) reveal that the single isolated components provide almost equal contribution to the overall scattering, since their extinction coefficients are almost the same. These considerations justify our approach of equally reducing the concentration of all the nutrients.

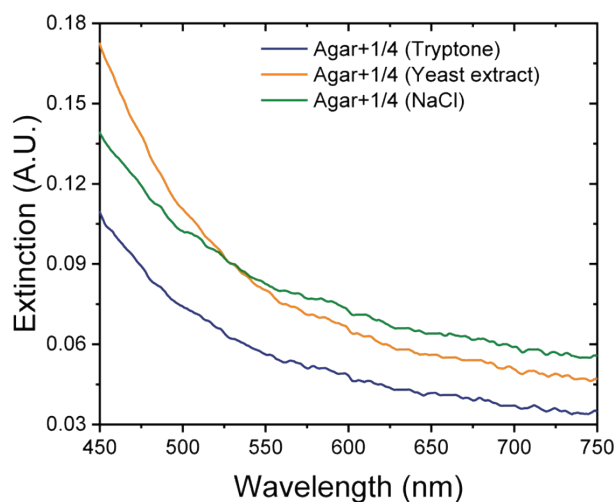

**Figure R1** - Extinction curves of films containing only one component, based on the LB<sub>4</sub>A formulation: tryptone (blue curve), yeast extract (yellow curve) and NaCl (green).

### Section 3 – Produced Data

Produced data for Figure 1a:

| $\lambda$<br>(nm) | Abs<br>(LBA) | Abs<br>(LB <sub>2</sub> A) | Abs<br>(LB <sub>4</sub> A) |
|-------------------|--------------|----------------------------|----------------------------|
| 354               | 86.045       | 81.6644                    | 75.1357                    |
| 355               | 85.81355     | 81.34454                   | 74.71756                   |
| 356               | 85.57638     | 81.02056                   | 74.29867                   |
| 357               | 85.33348     | 80.69246                   | 73.87902                   |
| 358               | 85.08487     | 80.36024                   | 73.4586                    |
| 359               | 84.83053     | 80.0239                    | 73.03743                   |
| 360               | 84.57047     | 79.68343                   | 72.61549                   |
| 361               | 84.30469     | 79.33884                   | 72.19279                   |
| 362               | 84.03319     | 78.99013                   | 71.76934                   |
| 363               | 83.75596     | 78.6373                    | 71.34512                   |
| 364               | 83.47302     | 78.28035                   | 70.92014                   |
| 365               | 83.18435     | 77.91927                   | 70.4944                    |
| 366               | 82.88996     | 77.55407                   | 70.06789                   |
| 367               | 82.58985     | 77.18475                   | 69.64063                   |
| 368               | 82.28401     | 76.81131                   | 69.21261                   |
| 369               | 81.96828     | 76.42905                   | 68.77986                   |
| 370               | 81.64754     | 76.04399                   | 68.34698                   |
| 371               | 81.32209     | 75.65589                   | 67.91517                   |
| 372               | 80.99064     | 75.26342                   | 67.4847                    |
| 373               | 80.65365     | 74.86695                   | 67.05029                   |
| 374               | 80.31426     | 74.46972                   | 66.61702                   |
| 375               | 79.96825     | 74.06761                   | 66.18275                   |
| 376               | 79.61928     | 73.66531                   | 65.74996                   |
| 377               | 79.26459     | 73.25374                   | 65.31341                   |
| 378               | 78.90554     | 72.84297                   | 64.88101                   |
| 379               | 78.54225     | 72.43039                   | 64.4495                    |
| 380               | 78.17514     | 72.0135                    | 64.01915                   |
| 381               | 77.80044     | 71.59259                   | 63.5847                    |
| 382               | 77.4244      | 71.16933                   | 63.15389                   |
| 383               | 77.04253     | 70.74075                   | 62.71962                   |
| 384               | 76.65464     | 70.30911                   | 62.28585                   |
| 385               | 76.26168     | 69.87446                   | 61.85226                   |
| 386               | 75.86702     | 69.43763                   | 61.41981                   |
| 387               | 75.46545     | 68.99872                   | 60.98784                   |
| 388               | 75.05647     | 68.55508                   | 60.55585                   |
| 389               | 74.64594     | 68.11135                   | 60.12591                   |
| 390               | 74.22882     | 67.66493                   | 59.69474                   |
| 391               | 73.80656     | 67.2173                    | 59.26716                   |
| 392               | 73.37969     | 66.76526                   | 58.84144                   |
| 393               | 72.94843     | 66.31317                   | 58.41576                   |
| 394               | 72.51346     | 65.86039                   | 57.99326                   |
| 395               | 72.07561     | 65.40706                   | 57.57381                   |
| 396               | 71.6354      | 64.95437                   | 57.15819                   |
| 397               | 71.1935      | 64.50226                   | 56.74545                   |
| 398               | 70.74991     | 64.05027                   | 56.33837                   |
| 399               | 70.30555     | 63.59809                   | 55.93372                   |
| 400               | 69.86003     | 63.14821                   | 55.53368                   |
| 401               | 69.41278     | 62.70164                   | 55.13896                   |

|     |          |          |          |
|-----|----------|----------|----------|
| 402 | 68.96682 | 62.25729 | 54.7489  |
| 403 | 68.52081 | 61.81678 | 54.36396 |
| 404 | 68.07638 | 61.3788  | 53.98458 |
| 405 | 67.63172 | 60.9437  | 53.60939 |
| 406 | 67.18977 | 60.51153 | 53.24113 |
| 407 | 66.74942 | 60.08425 | 52.87724 |
| 408 | 66.31344 | 59.66233 | 52.52015 |
| 409 | 65.88034 | 59.24392 | 52.1674  |
| 410 | 65.45202 | 58.83235 | 51.82094 |
| 411 | 65.02798 | 58.4256  | 51.48091 |
| 412 | 64.60803 | 58.02555 | 51.14633 |
| 413 | 64.19025 | 57.62885 | 50.81678 |
| 414 | 63.77731 | 57.23759 | 50.49215 |
| 415 | 63.36945 | 56.85416 | 50.17605 |
| 416 | 62.964   | 56.47577 | 49.8637  |
| 417 | 62.56456 | 56.10376 | 49.55618 |
| 418 | 62.16928 | 55.73474 | 49.25239 |
| 419 | 61.7786  | 55.37288 | 48.95396 |
| 420 | 61.39267 | 55.01552 | 48.66084 |
| 421 | 61.01092 | 54.66291 | 48.37322 |
| 422 | 60.63492 | 54.3163  | 48.09069 |
| 423 | 60.26254 | 53.97514 | 47.81295 |
| 424 | 59.89531 | 53.63871 | 47.5407  |
| 425 | 59.53364 | 53.30729 | 47.27106 |
| 426 | 59.174   | 52.97908 | 47.0062  |
| 427 | 58.81979 | 52.65445 | 46.7455  |
| 428 | 58.46911 | 52.33485 | 46.4882  |
| 429 | 58.1221  | 52.0201  | 46.23633 |
| 430 | 57.77982 | 51.71041 | 45.98589 |
| 431 | 57.44151 | 51.40204 | 45.73898 |
| 432 | 57.10705 | 51.09777 | 45.49485 |
| 433 | 56.77638 | 50.79856 | 45.2551  |
| 434 | 56.44851 | 50.50227 | 45.01821 |
| 435 | 56.12558 | 50.21032 | 44.78451 |
| 436 | 55.80531 | 49.92105 | 44.55092 |
| 437 | 55.4911  | 49.637   | 44.32341 |
| 438 | 55.17803 | 49.3554  | 44.0979  |
| 439 | 54.87096 | 49.07805 | 43.87477 |
| 440 | 54.56576 | 48.8048  | 43.65666 |
| 441 | 54.26348 | 48.53509 | 43.43948 |
| 442 | 53.96567 | 48.26891 | 43.22544 |
| 443 | 53.67312 | 48.00949 | 43.01559 |
| 444 | 53.3818  | 47.75118 | 42.80718 |
| 445 | 53.09454 | 47.49659 | 42.60069 |
| 446 | 52.81011 | 47.24554 | 42.39691 |
| 447 | 52.52864 | 46.99772 | 42.19546 |
| 448 | 52.25082 | 46.75464 | 41.99898 |
| 449 | 51.97618 | 46.51337 | 41.80543 |
| 450 | 51.70512 | 46.27575 | 41.61466 |
| 451 | 51.43489 | 46.0418  | 41.42663 |

|     |          |          |          |
|-----|----------|----------|----------|
| 452 | 51.16702 | 45.80986 | 41.24098 |
| 453 | 50.90296 | 45.58147 | 41.05947 |
| 454 | 50.64323 | 45.35671 | 40.88119 |
| 455 | 50.38425 | 45.13398 | 40.70425 |
| 456 | 50.1284  | 44.91509 | 40.53059 |
| 457 | 49.87534 | 44.69854 | 40.35899 |
| 458 | 49.62608 | 44.48569 | 40.19183 |
| 459 | 49.37749 | 44.27451 | 40.02618 |
| 460 | 49.13085 | 44.06609 | 39.86354 |
| 461 | 48.88664 | 43.86105 | 39.70367 |
| 462 | 48.64552 | 43.65737 | 39.54583 |
| 463 | 48.40557 | 43.45683 | 39.39004 |
| 464 | 48.16901 | 43.25807 | 39.23478 |
| 465 | 47.93488 | 43.06212 | 39.08417 |
| 466 | 47.70198 | 42.86851 | 38.93523 |
| 467 | 47.47175 | 42.67709 | 38.78635 |
| 468 | 47.24287 | 42.48752 | 38.6409  |
| 469 | 47.01497 | 42.29998 | 38.49506 |
| 470 | 46.78977 | 42.11447 | 38.35053 |
| 471 | 46.56591 | 41.92968 | 38.20715 |
| 472 | 46.34372 | 41.7475  | 38.06653 |
| 473 | 46.12162 | 41.5651  | 37.92491 |
| 474 | 45.90152 | 41.38365 | 37.78349 |
| 475 | 45.68315 | 41.20423 | 37.64443 |
| 476 | 45.466   | 41.02518 | 37.50644 |
| 477 | 45.25    | 40.84825 | 37.3711  |
| 478 | 45.03389 | 40.67159 | 37.23495 |
| 479 | 44.8179  | 40.49536 | 37.10132 |
| 480 | 44.60308 | 40.31954 | 36.96666 |
| 481 | 44.39074 | 40.1454  | 36.83338 |
| 482 | 44.1785  | 39.97196 | 36.70141 |
| 483 | 43.968   | 39.79993 | 36.57057 |
| 484 | 43.75895 | 39.62844 | 36.44107 |
| 485 | 43.55111 | 39.46002 | 36.31315 |
| 486 | 43.34423 | 39.29191 | 36.18711 |
| 487 | 43.13791 | 39.12556 | 36.06143 |
| 488 | 42.93274 | 38.95981 | 35.93642 |
| 489 | 42.72863 | 38.79446 | 35.81287 |
| 490 | 42.52629 | 38.6319  | 35.68977 |
| 491 | 42.32451 | 38.4692  | 35.56644 |
| 492 | 42.12452 | 38.30862 | 35.44583 |
| 493 | 41.92555 | 38.14822 | 35.3274  |
| 494 | 41.72975 | 37.9915  | 35.21081 |
| 495 | 41.535   | 37.83581 | 35.09481 |
| 496 | 41.34265 | 37.68206 | 34.98115 |
| 497 | 41.15239 | 37.52949 | 34.86791 |
| 498 | 40.96345 | 37.37944 | 34.75599 |
| 499 | 40.77794 | 37.23133 | 34.64627 |
| 500 | 40.59449 | 37.08458 | 34.53731 |
| 501 | 40.41294 | 36.93923 | 34.42966 |
| 502 | 40.23374 | 36.79602 | 34.32191 |
| 503 | 40.057   | 36.65456 | 34.21632 |
| 504 | 39.88229 | 36.51506 | 34.1118  |
| 505 | 39.71165 | 36.37855 | 34.00954 |

|     |          |          |          |
|-----|----------|----------|----------|
| 506 | 39.54216 | 36.24266 | 33.9081  |
| 507 | 39.37615 | 36.10906 | 33.80768 |
| 508 | 39.21227 | 35.97634 | 33.70788 |
| 509 | 39.05171 | 35.8461  | 33.60943 |
| 510 | 38.8929  | 35.71778 | 33.51252 |
| 511 | 38.73668 | 35.59074 | 33.41599 |
| 512 | 38.58282 | 35.46555 | 33.32166 |
| 513 | 38.43068 | 35.34204 | 33.22638 |
| 514 | 38.2809  | 35.22025 | 33.1334  |
| 515 | 38.13337 | 35.09977 | 33.03888 |
| 516 | 37.98747 | 34.98127 | 32.94693 |
| 517 | 37.84348 | 34.86279 | 32.8546  |
| 518 | 37.70231 | 34.74667 | 32.76428 |
| 519 | 37.56321 | 34.63241 | 32.67572 |
| 520 | 37.42572 | 34.51883 | 32.58754 |
| 521 | 37.29048 | 34.40733 | 32.5019  |
| 522 | 37.15697 | 34.29596 | 32.41672 |
| 523 | 37.02464 | 34.18715 | 32.33275 |
| 524 | 36.89354 | 34.07841 | 32.24783 |
| 525 | 36.76339 | 33.97096 | 32.16432 |
| 526 | 36.63526 | 33.86474 | 32.08152 |
| 527 | 36.50953 | 33.7604  | 32.00072 |
| 528 | 36.38347 | 33.65476 | 31.91864 |
| 529 | 36.25912 | 33.55199 | 31.83932 |
| 530 | 36.13523 | 33.44979 | 31.75939 |
| 531 | 36.01221 | 33.34806 | 31.68021 |
| 532 | 35.89055 | 33.24619 | 31.60074 |
| 533 | 35.7667  | 33.14391 | 31.52042 |
| 534 | 35.64277 | 33.04002 | 31.43915 |
| 535 | 35.51835 | 32.93637 | 31.35754 |
| 536 | 35.39455 | 32.83253 | 31.27673 |
| 537 | 35.2727  | 32.7321  | 31.19719 |
| 538 | 35.15193 | 32.63159 | 31.11883 |
| 539 | 35.03494 | 32.53317 | 31.04189 |
| 540 | 34.91701 | 32.43533 | 30.96618 |
| 541 | 34.80271 | 32.33985 | 30.89173 |
| 542 | 34.69004 | 32.24629 | 30.81836 |
| 543 | 34.57881 | 32.15388 | 30.74607 |
| 544 | 34.47082 | 32.06436 | 30.67701 |
| 545 | 34.36341 | 31.97433 | 30.60746 |
| 546 | 34.25884 | 31.88713 | 30.54057 |
| 547 | 34.15692 | 31.80321 | 30.47667 |
| 548 | 34.05608 | 31.71944 | 30.41238 |
| 549 | 33.9558  | 31.63714 | 30.34923 |
| 550 | 33.8585  | 31.55541 | 30.28875 |
| 551 | 33.76282 | 31.47684 | 30.2281  |
| 552 | 33.66892 | 31.39924 | 30.16991 |
| 553 | 33.5763  | 31.32468 | 30.11292 |
| 554 | 33.4855  | 31.25141 | 30.05681 |
| 555 | 33.39633 | 31.17774 | 30.00133 |
| 556 | 33.30538 | 31.10373 | 29.94512 |
| 557 | 33.21743 | 31.03214 | 29.89097 |
| 558 | 33.14887 | 30.97961 | 29.85435 |
| 559 | 33.07593 | 30.92153 | 29.81276 |

|     |          |          |          |
|-----|----------|----------|----------|
| 560 | 32.99424 | 30.8559  | 29.76328 |
| 561 | 32.90553 | 30.78367 | 29.70719 |
| 562 | 32.81099 | 30.70568 | 29.64549 |
| 563 | 32.71383 | 30.62396 | 29.58132 |
| 564 | 32.61299 | 30.53983 | 29.51388 |
| 565 | 32.50993 | 30.4537  | 29.44442 |
| 566 | 32.40435 | 30.36352 | 29.37128 |
| 567 | 32.2971  | 30.27163 | 29.29671 |
| 568 | 32.18836 | 30.17905 | 29.22092 |
| 569 | 32.07921 | 30.08657 | 29.14417 |
| 570 | 31.97109 | 29.99329 | 29.0681  |
| 571 | 31.86302 | 29.90035 | 28.99233 |
| 572 | 31.75621 | 29.80904 | 28.91796 |
| 573 | 31.65061 | 29.71762 | 28.84418 |
| 574 | 31.5483  | 29.62956 | 28.77331 |
| 575 | 31.44873 | 29.54531 | 28.70574 |
| 576 | 31.35267 | 29.46347 | 28.63992 |
| 577 | 31.26086 | 29.38546 | 28.57866 |
| 578 | 31.17319 | 29.31128 | 28.52213 |
| 579 | 31.09099 | 29.24364 | 28.47002 |
| 580 | 31.01363 | 29.18073 | 28.42282 |
| 581 | 30.94174 | 29.12248 | 28.37987 |
| 582 | 30.87492 | 29.06978 | 28.34076 |
| 583 | 30.81538 | 29.02214 | 28.30814 |
| 584 | 30.76089 | 28.97981 | 28.2802  |
| 585 | 30.71296 | 28.94397 | 28.2574  |
| 586 | 30.67252 | 28.91451 | 28.24123 |
| 587 | 30.62326 | 28.87634 | 28.21632 |
| 588 | 30.56199 | 28.82664 | 28.17976 |
| 589 | 30.49825 | 28.77402 | 28.14046 |
| 590 | 30.43198 | 28.71781 | 28.09788 |
| 591 | 30.36386 | 28.66023 | 28.05365 |
| 592 | 30.29407 | 28.60063 | 28.00642 |
| 593 | 30.22192 | 28.53856 | 27.95629 |
| 594 | 30.14902 | 28.47569 | 27.90483 |
| 595 | 30.07569 | 28.41112 | 27.8511  |
| 596 | 30.0012  | 28.34663 | 27.79718 |
| 597 | 29.92794 | 28.28242 | 27.74327 |
| 598 | 29.85581 | 28.21874 | 27.69059 |
| 599 | 29.78601 | 28.15773 | 27.63914 |
| 600 | 29.71861 | 28.09839 | 27.58984 |
| 601 | 29.65502 | 28.04309 | 27.54363 |
| 602 | 29.59563 | 27.9918  | 27.5003  |
| 603 | 29.54133 | 27.94571 | 27.4623  |
| 604 | 29.4912  | 27.90383 | 27.42783 |
| 605 | 29.44731 | 27.86791 | 27.39937 |
| 606 | 29.40852 | 27.83764 | 27.37495 |
| 607 | 29.37544 | 27.81202 | 27.35609 |
| 608 | 29.34799 | 27.79282 | 27.34231 |
| 609 | 29.32525 | 27.77779 | 27.33268 |
| 610 | 29.30628 | 27.76715 | 27.32622 |
| 611 | 29.29173 | 27.7594  | 27.32472 |
| 612 | 29.28049 | 27.755   | 27.32524 |
| 613 | 29.27085 | 27.75266 | 27.32764 |

|     |          |          |          |
|-----|----------|----------|----------|
| 614 | 29.26306 | 27.75187 | 27.33243 |
| 615 | 29.25639 | 27.75204 | 27.33756 |
| 616 | 29.25002 | 27.75246 | 27.34334 |
| 617 | 29.24165 | 27.75091 | 27.34763 |
| 618 | 29.23289 | 27.74804 | 27.35079 |
| 619 | 29.22248 | 27.74352 | 27.35229 |
| 620 | 29.20959 | 27.73713 | 27.3521  |
| 621 | 29.19371 | 27.72768 | 27.34901 |
| 622 | 29.17398 | 27.71514 | 27.3435  |
| 623 | 29.15045 | 27.69793 | 27.33388 |
| 624 | 29.1235  | 27.67844 | 27.32186 |
| 625 | 29.09251 | 27.65534 | 27.30604 |
| 626 | 29.05749 | 27.62753 | 27.28675 |
| 627 | 29.01817 | 27.59561 | 27.26249 |
| 628 | 28.97441 | 27.55984 | 27.23502 |
| 629 | 28.92715 | 27.52058 | 27.20402 |
| 630 | 28.87656 | 27.47796 | 27.16981 |
| 631 | 28.82278 | 27.43243 | 27.13287 |
| 632 | 28.76528 | 27.38297 | 27.09248 |
| 633 | 28.7052  | 27.33147 | 27.04938 |
| 634 | 28.64262 | 27.27768 | 27.00433 |
| 635 | 28.57801 | 27.22139 | 26.95768 |
| 636 | 28.51196 | 27.1644  | 26.90945 |
| 637 | 28.4437  | 27.10619 | 26.85941 |
| 638 | 28.3745  | 27.04689 | 26.80883 |
| 639 | 28.30496 | 26.98671 | 26.75751 |
| 640 | 28.23528 | 26.92677 | 26.7062  |
| 641 | 28.16652 | 26.86828 | 26.6553  |
| 642 | 28.09834 | 26.81074 | 26.60552 |
| 643 | 28.03137 | 26.75335 | 26.55607 |
| 644 | 27.96574 | 26.69746 | 26.50807 |
| 645 | 27.90209 | 26.64288 | 26.46175 |
| 646 | 27.84009 | 26.58958 | 26.41627 |
| 647 | 27.78163 | 26.54021 | 26.37406 |
| 648 | 27.72492 | 26.49206 | 26.33369 |
| 649 | 27.67037 | 26.44689 | 26.2949  |
| 650 | 27.61775 | 26.4034  | 26.25851 |
| 651 | 27.56764 | 26.36242 | 26.22372 |
| 652 | 27.52013 | 26.32404 | 26.1911  |
| 653 | 27.47522 | 26.28835 | 26.16075 |
| 654 | 27.43256 | 26.25411 | 26.13118 |
| 655 | 27.39179 | 26.22116 | 26.10318 |
| 656 | 27.35363 | 26.19114 | 26.07715 |
| 657 | 27.31813 | 26.16263 | 26.05232 |
| 658 | 27.2836  | 26.13558 | 26.02957 |
| 659 | 27.25131 | 26.10974 | 26.00833 |
| 660 | 27.22039 | 26.08568 | 25.98787 |
| 661 | 27.19082 | 26.06202 | 25.96853 |
| 662 | 27.16144 | 26.0398  | 25.95006 |
| 663 | 27.13342 | 26.01821 | 25.93251 |
| 664 | 27.106   | 25.99844 | 25.91567 |
| 665 | 27.07905 | 25.9787  | 25.89853 |
| 666 | 27.05355 | 25.96062 | 25.88285 |
| 667 | 27.02835 | 25.94273 | 25.86742 |

|     |          |          |          |
|-----|----------|----------|----------|
| 668 | 27.00299 | 25.92435 | 25.85219 |
| 669 | 26.97816 | 25.90619 | 25.83688 |
| 670 | 26.95443 | 25.88852 | 25.8226  |
| 671 | 26.93045 | 25.87049 | 25.8088  |
| 672 | 26.90715 | 25.85336 | 25.79511 |
| 673 | 26.884   | 25.83705 | 25.78206 |
| 674 | 26.86058 | 25.81945 | 25.76962 |
| 675 | 26.83724 | 25.80305 | 25.75618 |
| 676 | 26.81336 | 25.78641 | 25.74385 |
| 677 | 26.78963 | 25.76948 | 25.7314  |
| 678 | 26.76548 | 25.75311 | 25.71993 |
| 679 | 26.74035 | 25.73599 | 25.70812 |
| 680 | 26.71528 | 25.72006 | 25.69659 |
| 681 | 26.69085 | 25.70343 | 25.68534 |
| 682 | 26.66573 | 25.68665 | 25.67404 |
| 683 | 26.63994 | 25.66819 | 25.66184 |
| 684 | 26.61318 | 25.65023 | 25.64938 |
| 685 | 26.58741 | 25.63291 | 25.63773 |
| 686 | 26.56092 | 25.61456 | 25.62628 |
| 687 | 26.53403 | 25.59481 | 25.61586 |
| 688 | 26.50721 | 25.57688 | 25.60403 |
| 689 | 26.48014 | 25.55814 | 25.59231 |
| 690 | 26.45211 | 25.53974 | 25.58082 |
| 691 | 26.42445 | 25.52116 | 25.56908 |
| 692 | 26.39652 | 25.50247 | 25.55779 |
| 693 | 26.36807 | 25.48327 | 25.54664 |
| 694 | 26.34025 | 25.46388 | 25.53613 |
| 695 | 26.31081 | 25.44491 | 25.52548 |
| 696 | 26.28101 | 25.42468 | 25.51358 |
| 697 | 26.25069 | 25.40353 | 25.50129 |
| 698 | 26.22157 | 25.38315 | 25.49089 |
| 699 | 26.19203 | 25.36408 | 25.48093 |
| 700 | 26.16093 | 25.34393 | 25.46993 |
| 701 | 26.13005 | 25.32337 | 25.45908 |
| 702 | 26.09892 | 25.30275 | 25.44823 |
| 703 | 26.06815 | 25.28117 | 25.43777 |
| 704 | 26.03659 | 25.25982 | 25.42689 |
| 705 | 26.00489 | 25.2386  | 25.41667 |
| 706 | 25.97312 | 25.21765 | 25.4061  |
| 707 | 25.93981 | 25.19629 | 25.39542 |
| 708 | 25.9081  | 25.17652 | 25.3853  |
| 709 | 25.87655 | 25.15549 | 25.37491 |
| 710 | 25.84425 | 25.13282 | 25.36429 |
| 711 | 25.81201 | 25.1119  | 25.35413 |
| 712 | 25.77925 | 25.0901  | 25.34234 |
| 713 | 25.74773 | 25.06952 | 25.33305 |
| 714 | 25.7157  | 25.04902 | 25.32311 |
| 715 | 25.68353 | 25.0276  | 25.31376 |
| 716 | 25.65239 | 25.00733 | 25.3043  |
| 717 | 25.62177 | 24.98769 | 25.29471 |
| 718 | 25.59018 | 24.96737 | 25.28519 |
| 719 | 25.55944 | 24.94765 | 25.27528 |
| 720 | 25.52916 | 24.92667 | 25.26588 |
| 721 | 25.49789 | 24.90614 | 25.25708 |

|     |          |          |          |
|-----|----------|----------|----------|
| 722 | 25.46712 | 24.88483 | 25.24839 |
| 723 | 25.43704 | 24.86527 | 25.24088 |
| 724 | 25.40751 | 24.84499 | 25.23216 |
| 725 | 25.37769 | 24.8249  | 25.22352 |
| 726 | 25.34726 | 24.80405 | 25.21695 |
| 727 | 25.31767 | 24.7845  | 25.20821 |
| 728 | 25.28778 | 24.76498 | 25.20018 |
| 729 | 25.25768 | 24.74556 | 25.19081 |
| 730 | 25.22872 | 24.72614 | 25.18227 |
| 731 | 25.20002 | 24.70512 | 25.17402 |
| 732 | 25.17101 | 24.68562 | 25.16541 |
| 733 | 25.14254 | 24.66668 | 25.15737 |
| 734 | 25.11451 | 24.64714 | 25.14895 |
| 735 | 25.08705 | 24.62792 | 25.1407  |
| 736 | 25.06116 | 24.60892 | 25.13222 |
| 737 | 25.03425 | 24.58972 | 25.12427 |
| 738 | 25.00541 | 24.56797 | 25.11408 |
| 739 | 24.97883 | 24.54959 | 25.10699 |
| 740 | 24.95092 | 24.53076 | 25.09862 |
| 741 | 24.92489 | 24.51231 | 25.09157 |
| 742 | 24.89948 | 24.49553 | 25.08426 |
| 743 | 24.87374 | 24.47876 | 25.07662 |
| 744 | 24.84898 | 24.46056 | 25.06984 |
| 745 | 24.82535 | 24.44359 | 25.06185 |
| 746 | 24.80141 | 24.4266  | 25.05472 |
| 747 | 24.77741 | 24.40958 | 25.04758 |
| 748 | 24.75231 | 24.39059 | 25.03884 |
| 749 | 24.72884 | 24.37314 | 25.03188 |
| 750 | 24.7062  | 24.35569 | 25.0258  |
| 751 | 24.68447 | 24.33983 | 25.02038 |
| 752 | 24.66273 | 24.32583 | 25.01303 |
| 753 | 24.64078 | 24.31183 | 25.0079  |
| 754 | 24.61917 | 24.29754 | 25.00166 |
| 755 | 24.59868 | 24.28476 | 24.99503 |
| 756 | 24.57868 | 24.27229 | 24.98956 |
| 757 | 24.55774 | 24.25898 | 24.98244 |
| 758 | 24.53899 | 24.2475  | 24.97762 |
| 759 | 24.51925 | 24.234   | 24.97167 |
| 760 | 24.49882 | 24.22116 | 24.96481 |
| 761 | 24.47975 | 24.20813 | 24.95864 |
| 762 | 24.46208 | 24.19628 | 24.95345 |
| 763 | 24.44533 | 24.18488 | 24.94692 |
| 764 | 24.42768 | 24.17211 | 24.94043 |
| 765 | 24.40993 | 24.16026 | 24.93611 |
| 766 | 24.39371 | 24.14869 | 24.9321  |
| 767 | 24.3771  | 24.13747 | 24.92734 |
| 768 | 24.36156 | 24.12729 | 24.92329 |
| 769 | 24.34547 | 24.11643 | 24.91768 |
| 770 | 24.33073 | 24.10605 | 24.91168 |
| 771 | 24.31462 | 24.09469 | 24.90671 |
| 772 | 24.29845 | 24.0804  | 24.90084 |
| 773 | 24.2827  | 24.06838 | 24.89484 |
| 774 | 24.26612 | 24.05665 | 24.89001 |
| 775 | 24.25047 | 24.04404 | 24.88391 |

|     |          |          |          |
|-----|----------|----------|----------|
| 776 | 24.23523 | 24.03137 | 24.87724 |
| 777 | 24.22018 | 24.02051 | 24.8725  |
| 778 | 24.20592 | 24.00947 | 24.8682  |
| 779 | 24.19368 | 23.99928 | 24.8642  |
| 780 | 24.18124 | 23.99133 | 24.86052 |
| 781 | 24.16757 | 23.98227 | 24.8545  |
| 782 | 24.15474 | 23.97156 | 24.85042 |
| 783 | 24.14181 | 23.96423 | 24.84597 |
| 784 | 24.12985 | 23.95552 | 24.84112 |
| 785 | 24.11734 | 23.94597 | 24.83608 |
| 786 | 24.10448 | 23.93601 | 24.82999 |
| 787 | 24.09224 | 23.92687 | 24.82555 |
| 788 | 24.08019 | 23.91787 | 24.82121 |

|     |          |          |          |
|-----|----------|----------|----------|
| 789 | 24.06835 | 23.90899 | 24.81697 |
| 790 | 24.05671 | 23.90024 | 24.81283 |
| 791 | 24.04527 | 23.89163 | 24.80878 |
| 792 | 24.03404 | 23.88315 | 24.80484 |
| 793 | 24.023   | 23.87479 | 24.80099 |
| 794 | 24.01217 | 23.86657 | 24.79724 |
| 795 | 24.00153 | 23.85848 | 24.79358 |
| 796 | 23.9911  | 23.85052 | 24.79003 |
| 797 | 23.98087 | 23.84269 | 24.78657 |
| 798 | 23.97085 | 23.83499 | 24.78321 |
| 799 | 23.96102 | 23.82742 | 24.77995 |
| 800 | 23.9514  | 23.81998 | 24.77678 |

**Produced data for Figure 1b:**

| $\lambda$<br>(nm) | Scatt<br>LBA | Scatt<br>LB2A | Scatt<br>LB4A |
|-------------------|--------------|---------------|---------------|
| 354               | 14.15991     | 10.61926      | 7.11779       |
| 355               | 14.12702     | 10.60391      | 7.10605       |
| 356               | 14.16994     | 10.63231      | 7.12862       |
| 357               | 14.15202     | 10.6167       | 7.13249       |
| 358               | 14.1533      | 10.63135      | 7.1287        |
| 359               | 14.15533     | 10.62492      | 7.12713       |
| 360               | 14.13588     | 10.62039      | 7.12443       |
| 361               | 14.16172     | 10.61885      | 7.10515       |
| 362               | 14.16554     | 10.63182      | 7.12645       |
| 363               | 14.16162     | 10.6202       | 7.13154       |
| 364               | 14.16213     | 10.62925      | 7.13068       |
| 365               | 14.16005     | 10.6175       | 7.13214       |
| 366               | 14.16046     | 10.62094      | 7.13912       |
| 367               | 14.15853     | 10.63507      | 7.13224       |
| 368               | 14.17273     | 10.62663      | 7.13492       |
| 369               | 14.16795     | 10.63926      | 7.13578       |
| 370               | 14.15501     | 10.62715      | 7.13258       |
| 371               | 14.16984     | 10.64413      | 7.1416        |
| 372               | 14.17674     | 10.63693      | 7.13401       |
| 373               | 14.16283     | 10.6429       | 7.14049       |
| 374               | 14.171       | 10.63893      | 7.14164       |
| 375               | 14.15749     | 10.6454       | 7.13969       |
| 376               | 14.18338     | 10.65213      | 7.14793       |
| 377               | 14.16308     | 10.64812      | 7.15308       |
| 378               | 14.1696      | 10.6369       | 7.15392       |
| 379               | 14.17249     | 10.66656      | 7.14997       |
| 380               | 14.15972     | 10.65868      | 7.15241       |
| 381               | 14.1633      | 10.65896      | 7.16127       |
| 382               | 14.16264     | 10.64911      | 7.15625       |
| 383               | 14.17255     | 10.66467      | 7.15753       |
| 384               | 14.1684      | 10.66211      | 7.17224       |
| 385               | 14.16549     | 10.66126      | 7.16366       |
| 386               | 14.17154     | 10.66426      | 7.16896       |
| 387               | 14.17596     | 10.67441      | 7.15628       |
| 388               | 14.16516     | 10.67414      | 7.15742       |
| 389               | 14.16083     | 10.67094      | 7.16473       |
| 390               | 14.18101     | 10.67421      | 7.16071       |

|     |          |          |         |
|-----|----------|----------|---------|
| 391 | 14.16109 | 10.67336 | 7.15821 |
| 392 | 14.16975 | 10.68532 | 7.1737  |
| 393 | 14.14691 | 10.68195 | 7.1703  |
| 394 | 14.15101 | 10.69123 | 7.16527 |
| 395 | 14.13998 | 10.67848 | 7.17133 |
| 396 | 14.14916 | 10.68872 | 7.17579 |
| 397 | 14.14683 | 10.69207 | 7.17681 |
| 398 | 14.15176 | 10.69272 | 7.17064 |
| 399 | 14.15167 | 10.69162 | 7.17569 |
| 400 | 14.1306  | 10.69152 | 7.17294 |
| 401 | 14.14087 | 10.70416 | 7.17258 |
| 402 | 14.15168 | 10.696   | 7.17897 |
| 403 | 14.12932 | 10.70157 | 7.16516 |
| 404 | 14.14226 | 10.69434 | 7.17857 |
| 405 | 14.13703 | 10.6879  | 7.17733 |
| 406 | 14.13148 | 10.70422 | 7.16988 |
| 407 | 14.11724 | 10.70166 | 7.1642  |
| 408 | 14.11398 | 10.69093 | 7.16498 |
| 409 | 14.11348 | 10.69343 | 7.15906 |
| 410 | 14.09943 | 10.7065  | 7.1693  |
| 411 | 14.11206 | 10.70083 | 7.16429 |
| 412 | 14.11189 | 10.69429 | 7.17144 |
| 413 | 14.10927 | 10.70654 | 7.17477 |
| 414 | 14.10531 | 10.69565 | 7.17108 |
| 415 | 14.10918 | 10.70004 | 7.16619 |
| 416 | 14.08395 | 10.7018  | 7.18037 |
| 417 | 14.09138 | 10.68946 | 7.16079 |
| 418 | 14.10519 | 10.6987  | 7.16434 |
| 419 | 14.08967 | 10.70624 | 7.16612 |
| 420 | 14.07393 | 10.71679 | 7.1642  |
| 421 | 14.08919 | 10.72059 | 7.16437 |
| 422 | 14.08933 | 10.72192 | 7.1593  |
| 423 | 14.08039 | 10.7117  | 7.15662 |
| 424 | 14.07851 | 10.71649 | 7.14751 |
| 425 | 14.05879 | 10.70839 | 7.1586  |
| 426 | 14.07385 | 10.7153  | 7.15566 |
| 427 | 14.08216 | 10.73187 | 7.15162 |
| 428 | 14.07169 | 10.71265 | 7.14731 |
| 429 | 14.07055 | 10.71647 | 7.15396 |



|     |          |          |         |
|-----|----------|----------|---------|
| 430 | 14.11004 | 10.76347 | 7.14299 |
| 431 | 14.05292 | 10.71236 | 7.15605 |
| 432 | 14.07014 | 10.71439 | 7.15237 |
| 433 | 14.06028 | 10.7302  | 7.15403 |
| 434 | 14.06563 | 10.71315 | 7.14112 |
| 435 | 14.06067 | 10.7197  | 7.14808 |
| 436 | 14.06304 | 10.73327 | 7.14476 |
| 437 | 14.07316 | 10.72403 | 7.1552  |
| 438 | 14.06913 | 10.7291  | 7.15955 |
| 439 | 14.05671 | 10.72383 | 7.14425 |
| 440 | 14.06509 | 10.72704 | 7.14644 |
| 441 | 14.05577 | 10.71807 | 7.14652 |
| 442 | 14.06951 | 10.7303  | 7.14533 |
| 443 | 14.06486 | 10.73509 | 7.13638 |
| 444 | 14.04953 | 10.72279 | 7.14175 |
| 445 | 14.06302 | 10.70226 | 7.14904 |
| 446 | 14.06287 | 10.73081 | 7.14577 |
| 447 | 14.04662 | 10.72897 | 7.14821 |
| 448 | 14.06344 | 10.72912 | 7.14759 |
| 449 | 14.057   | 10.72562 | 7.14562 |
| 450 | 14.06409 | 10.74053 | 7.17014 |
| 451 | 14.05812 | 10.74724 | 7.14742 |
| 452 | 14.0654  | 10.75034 | 7.1434  |
| 453 | 14.06342 | 10.73838 | 7.14578 |
| 454 | 14.06803 | 10.753   | 7.14006 |
| 455 | 14.06887 | 10.7548  | 7.14564 |
| 456 | 14.0898  | 10.77466 | 7.13939 |
| 457 | 14.07636 | 10.74971 | 7.14518 |
| 458 | 14.06786 | 10.74957 | 7.14401 |
| 459 | 14.07732 | 10.75352 | 7.15288 |
| 460 | 14.08179 | 10.75214 | 7.15114 |
| 461 | 14.07846 | 10.76546 | 7.14813 |
| 462 | 14.08387 | 10.7745  | 7.15339 |
| 463 | 14.08109 | 10.76421 | 7.14965 |
| 464 | 14.07506 | 10.76997 | 7.15696 |
| 465 | 14.08718 | 10.7563  | 7.15615 |
| 466 | 14.07673 | 10.76614 | 7.14567 |
| 467 | 14.09439 | 10.77714 | 7.15684 |
| 468 | 14.09677 | 10.77263 | 7.15925 |
| 469 | 14.09366 | 10.78002 | 7.15997 |
| 470 | 14.1052  | 10.78436 | 7.16497 |
| 471 | 14.09002 | 10.78465 | 7.1573  |
| 472 | 14.11442 | 10.79014 | 7.15108 |
| 473 | 14.10327 | 10.79505 | 7.16114 |
| 474 | 14.10484 | 10.78818 | 7.1671  |
| 475 | 14.11246 | 10.78971 | 7.16116 |
| 476 | 14.10445 | 10.79458 | 7.16544 |
| 477 | 14.12288 | 10.80349 | 7.1627  |
| 478 | 14.09922 | 10.79469 | 7.16381 |
| 479 | 14.10675 | 10.80599 | 7.16706 |
| 480 | 14.11388 | 10.80328 | 7.16633 |
| 481 | 14.11166 | 10.79694 | 7.17657 |
| 482 | 14.11    | 10.80224 | 7.16746 |
| 483 | 14.11156 | 10.80857 | 7.1653  |

|     |          |          |         |
|-----|----------|----------|---------|
| 484 | 14.11333 | 10.80857 | 7.17019 |
| 485 | 14.09044 | 10.77645 | 7.17594 |
| 486 | 14.10651 | 10.8084  | 7.16795 |
| 487 | 14.11734 | 10.81722 | 7.16881 |
| 488 | 14.12442 | 10.8188  | 7.16728 |
| 489 | 14.12096 | 10.81092 | 7.16742 |
| 490 | 14.11178 | 10.82703 | 7.17548 |
| 491 | 14.11433 | 10.82056 | 7.17151 |
| 492 | 14.11844 | 10.82815 | 7.18099 |
| 493 | 14.12728 | 10.82862 | 7.17624 |
| 494 | 14.11854 | 10.82471 | 7.16723 |
| 495 | 14.11164 | 10.82551 | 7.17937 |
| 496 | 14.10834 | 10.82246 | 7.16912 |
| 497 | 14.11171 | 10.82659 | 7.17475 |
| 498 | 14.1109  | 10.83537 | 7.17582 |
| 499 | 14.12024 | 10.83887 | 7.17293 |
| 500 | 14.10154 | 10.82482 | 7.18311 |
| 501 | 14.11249 | 10.82955 | 7.1707  |
| 502 | 14.11462 | 10.83324 | 7.17942 |
| 503 | 14.12187 | 10.83293 | 7.17598 |
| 504 | 14.07709 | 10.81587 | 7.18096 |
| 505 | 14.107   | 10.83204 | 7.17766 |
| 506 | 14.10202 | 10.83868 | 7.18046 |
| 507 | 14.10386 | 10.83476 | 7.16999 |
| 508 | 14.10624 | 10.83762 | 7.18039 |
| 509 | 14.09619 | 10.83788 | 7.17016 |
| 510 | 14.09034 | 10.84254 | 7.1833  |
| 511 | 14.09488 | 10.84177 | 7.17244 |
| 512 | 14.09981 | 10.83327 | 7.16892 |
| 513 | 14.10516 | 10.83489 | 7.16865 |
| 514 | 14.10016 | 10.84627 | 7.17923 |
| 515 | 14.05124 | 10.81368 | 7.19197 |
| 516 | 14.08662 | 10.85002 | 7.1693  |
| 517 | 14.08353 | 10.86165 | 7.16833 |
| 518 | 14.08787 | 10.84295 | 7.14615 |
| 519 | 14.08388 | 10.8439  | 7.17627 |
| 520 | 14.08565 | 10.85322 | 7.17266 |
| 521 | 14.09122 | 10.84601 | 7.16548 |
| 522 | 14.08627 | 10.85981 | 7.17433 |
| 523 | 14.06312 | 10.83407 | 7.17745 |
| 524 | 14.0763  | 10.85577 | 7.17639 |
| 525 | 14.08052 | 10.84651 | 7.17989 |
| 526 | 14.06342 | 10.85447 | 7.18124 |
| 527 | 14.07127 | 10.852   | 7.14932 |
| 528 | 14.07061 | 10.86376 | 7.17678 |
| 529 | 14.07728 | 10.86885 | 7.17039 |
| 530 | 14.09539 | 10.8747  | 7.17507 |
| 531 | 14.07932 | 10.88149 | 7.17782 |
| 532 | 14.06733 | 10.85206 | 7.18038 |
| 533 | 14.0656  | 10.86635 | 7.16696 |
| 534 | 14.06931 | 10.86179 | 7.17127 |
| 535 | 14.07547 | 10.89443 | 7.17155 |
| 536 | 14.06052 | 10.8726  | 7.16162 |
| 537 | 14.06559 | 10.86571 | 7.16959 |

|     |          |          |         |
|-----|----------|----------|---------|
| 538 | 14.07437 | 10.87699 | 7.16619 |
| 539 | 14.05492 | 10.88278 | 7.17723 |
| 540 | 14.00153 | 10.83716 | 7.19167 |
| 541 | 14.06661 | 10.87824 | 7.16647 |
| 542 | 14.04952 | 10.89462 | 7.16758 |
| 543 | 14.06702 | 10.88368 | 7.15387 |
| 544 | 14.05677 | 10.87773 | 7.16616 |
| 545 | 14.05376 | 10.88429 | 7.14971 |
| 546 | 14.06197 | 10.90865 | 7.16353 |
| 547 | 14.06746 | 10.90421 | 7.16565 |
| 548 | 14.03513 | 10.89819 | 7.17386 |
| 549 | 14.05892 | 10.90304 | 7.16939 |
| 550 | 14.06769 | 10.89225 | 7.1632  |
| 551 | 14.05436 | 10.90379 | 7.16739 |
| 552 | 14.04295 | 10.90453 | 7.17775 |
| 553 | 14.05437 | 10.91549 | 7.18158 |
| 554 | 14.05868 | 10.92715 | 7.17064 |
| 555 | 14.07033 | 10.90273 | 7.1823  |
| 556 | 14.03304 | 10.8963  | 7.1849  |
| 557 | 14.0599  | 10.90798 | 7.18055 |
| 558 | 14.04913 | 10.92781 | 7.17134 |
| 559 | 14.05088 | 10.93585 | 7.15558 |
| 560 | 14.05479 | 10.91353 | 7.18275 |
| 561 | 14.04777 | 10.92996 | 7.17902 |
| 562 | 14.07116 | 10.94861 | 7.17486 |
| 563 | 14.08503 | 10.93863 | 7.18537 |
| 564 | 14.03048 | 10.92429 | 7.18925 |
| 565 | 14.07782 | 10.95928 | 7.19615 |
| 566 | 14.05584 | 10.94813 | 7.18934 |
| 567 | 14.07323 | 10.96961 | 7.16946 |
| 568 | 14.0664  | 10.96178 | 7.18582 |
| 569 | 14.06925 | 10.96642 | 7.18546 |
| 570 | 14.08051 | 10.97987 | 7.19237 |
| 571 | 14.08878 | 10.99393 | 7.19822 |
| 572 | 14.08306 | 10.98541 | 7.20389 |
| 573 | 14.07764 | 10.98847 | 7.20903 |
| 574 | 14.07872 | 10.98532 | 7.19962 |
| 575 | 14.09381 | 10.99937 | 7.21785 |
| 576 | 14.10235 | 11.00022 | 7.21464 |
| 577 | 14.10739 | 11.01993 | 7.21515 |
| 578 | 14.123   | 11.0337  | 7.21453 |
| 579 | 14.11148 | 11.03852 | 7.21828 |
| 580 | 14.13626 | 11.0798  | 7.21479 |
| 581 | 14.0901  | 11.01231 | 7.23975 |
| 582 | 14.12715 | 11.05842 | 7.23489 |
| 583 | 14.13177 | 11.06283 | 7.23772 |
| 584 | 14.14587 | 11.08268 | 7.23566 |
| 585 | 14.14505 | 11.0698  | 7.2476  |
| 586 | 14.14379 | 11.08519 | 7.23722 |
| 587 | 14.14922 | 11.10187 | 7.25463 |
| 588 | 14.16402 | 11.10497 | 7.2548  |
| 589 | 14.17263 | 11.13907 | 7.26693 |
| 590 | 14.21905 | 11.14058 | 7.26726 |
| 591 | 14.156   | 11.11238 | 7.28776 |

|     |          |          |         |
|-----|----------|----------|---------|
| 592 | 14.19605 | 11.14282 | 7.28537 |
| 593 | 14.19743 | 11.17711 | 7.29115 |
| 594 | 14.20547 | 11.17364 | 7.28727 |
| 595 | 14.23041 | 11.1917  | 7.30902 |
| 596 | 14.2286  | 11.19751 | 7.30917 |
| 597 | 14.24782 | 11.21256 | 7.30805 |
| 598 | 14.26637 | 11.22132 | 7.31815 |
| 599 | 14.27449 | 11.26001 | 7.33529 |
| 600 | 14.26456 | 11.23605 | 7.3309  |
| 601 | 14.32111 | 11.27579 | 7.37009 |
| 602 | 14.31065 | 11.29123 | 7.36104 |
| 603 | 14.33077 | 11.30907 | 7.37017 |
| 604 | 14.34631 | 11.30343 | 7.36791 |
| 605 | 14.35463 | 11.35184 | 7.38931 |
| 606 | 14.38001 | 11.35402 | 7.39085 |
| 607 | 14.38665 | 11.37955 | 7.4155  |
| 608 | 14.41502 | 11.39009 | 7.42053 |
| 609 | 14.42105 | 11.40216 | 7.43227 |
| 610 | 14.38852 | 11.39634 | 7.43237 |
| 611 | 14.47372 | 11.44743 | 7.44939 |
| 612 | 14.47149 | 11.4554  | 7.46601 |
| 613 | 14.48607 | 11.50007 | 7.47924 |
| 614 | 14.5217  | 11.5167  | 7.47529 |
| 615 | 14.53463 | 11.52565 | 7.49067 |
| 616 | 14.54564 | 11.5516  | 7.4998  |
| 617 | 14.57204 | 11.56902 | 7.53578 |
| 618 | 14.61697 | 11.60643 | 7.54471 |
| 619 | 14.61461 | 11.62568 | 7.56117 |
| 620 | 14.64541 | 11.63616 | 7.567   |
| 621 | 14.67955 | 11.67343 | 7.58673 |
| 622 | 14.70753 | 11.69159 | 7.60509 |
| 623 | 14.701   | 11.73004 | 7.61744 |
| 624 | 14.73318 | 11.74555 | 7.64714 |
| 625 | 14.77343 | 11.77731 | 7.64807 |
| 626 | 14.79499 | 11.81244 | 7.65355 |
| 627 | 14.8182  | 11.83025 | 7.65855 |
| 628 | 14.84708 | 11.86882 | 7.69519 |
| 629 | 14.8753  | 11.88375 | 7.7196  |
| 630 | 14.90178 | 11.91178 | 7.74027 |
| 631 | 14.93114 | 11.94957 | 7.76247 |
| 632 | 14.96625 | 11.96847 | 7.78292 |
| 633 | 14.99471 | 12.00334 | 7.80354 |
| 634 | 15.00737 | 12.0271  | 7.8066  |
| 635 | 15.06382 | 12.07372 | 7.84842 |
| 636 | 15.11239 | 12.08493 | 7.86665 |
| 637 | 15.12944 | 12.14102 | 7.87688 |
| 638 | 15.16002 | 12.19055 | 7.89557 |
| 639 | 15.21813 | 12.2007  | 7.92588 |
| 640 | 15.2492  | 12.23553 | 7.94572 |
| 641 | 15.26273 | 12.26796 | 7.96802 |
| 642 | 15.28556 | 12.30342 | 7.97782 |
| 643 | 15.33409 | 12.33343 | 8.02084 |
| 644 | 15.398   | 12.4008  | 8.03265 |
| 645 | 15.39219 | 12.43305 | 8.04684 |

|     |          |          |         |
|-----|----------|----------|---------|
| 646 | 15.44231 | 12.4239  | 8.0794  |
| 647 | 15.49652 | 12.49346 | 8.10746 |
| 648 | 15.53163 | 12.52896 | 8.13145 |
| 649 | 15.57367 | 12.58207 | 8.14621 |
| 650 | 15.59612 | 12.61404 | 8.20336 |
| 651 | 15.64997 | 12.64007 | 8.19955 |
| 652 | 15.67452 | 12.69262 | 8.24641 |
| 653 | 15.69674 | 12.74074 | 8.25632 |
| 654 | 15.77363 | 12.77858 | 8.30429 |
| 655 | 15.80299 | 12.81569 | 8.32238 |
| 656 | 15.85492 | 12.85037 | 8.33983 |
| 657 | 15.87098 | 12.88064 | 8.36145 |
| 658 | 15.95307 | 12.93837 | 8.39689 |
| 659 | 15.98811 | 12.99611 | 8.40656 |
| 660 | 15.99787 | 13.01621 | 8.46583 |
| 661 | 16.05071 | 13.05397 | 8.47937 |
| 662 | 16.12085 | 13.13452 | 8.51092 |
| 663 | 16.14496 | 13.13258 | 8.54333 |
| 664 | 16.20457 | 13.20498 | 8.54046 |
| 665 | 16.23643 | 13.2288  | 8.59411 |
| 666 | 16.27909 | 13.27393 | 8.61578 |
| 667 | 16.31891 | 13.3144  | 8.64363 |
| 668 | 16.37823 | 13.39288 | 8.67164 |
| 669 | 16.40462 | 13.40298 | 8.69874 |
| 670 | 16.44689 | 13.46608 | 8.74028 |
| 671 | 16.47686 | 13.48316 | 8.75101 |
| 672 | 16.55945 | 13.54207 | 8.78185 |
| 673 | 16.61543 | 13.6199  | 8.80645 |
| 674 | 16.6573  | 13.64768 | 8.83939 |
| 675 | 16.68025 | 13.6679  | 8.88183 |
| 676 | 16.72408 | 13.72132 | 8.91394 |
| 677 | 16.7965  | 13.80398 | 8.93876 |
| 678 | 16.85225 | 13.82435 | 8.97769 |
| 679 | 16.86563 | 13.86012 | 8.99819 |
| 680 | 16.93447 | 13.92293 | 9.02591 |
| 681 | 16.97136 | 13.9598  | 9.06882 |
| 682 | 17.051   | 14.02251 | 9.09034 |
| 683 | 17.05902 | 14.07769 | 9.13713 |
| 684 | 17.09891 | 14.07456 | 9.15313 |
| 685 | 17.17333 | 14.1606  | 9.19311 |
| 686 | 17.22392 | 14.22964 | 9.22103 |
| 687 | 17.27728 | 14.27028 | 9.25953 |
| 688 | 17.33546 | 14.29371 | 9.27724 |
| 689 | 17.35378 | 14.34473 | 9.32457 |
| 690 | 17.39187 | 14.39465 | 9.31794 |
| 691 | 17.43282 | 14.41077 | 9.37063 |
| 692 | 17.52616 | 14.49124 | 9.40585 |
| 693 | 17.55911 | 14.53874 | 9.43415 |
| 694 | 17.57329 | 14.56889 | 9.45235 |
| 695 | 17.66339 | 14.63065 | 9.48682 |
| 696 | 17.70309 | 14.66279 | 9.5156  |
| 697 | 17.72134 | 14.7027  | 9.55436 |
| 698 | 17.76483 | 14.72382 | 9.56521 |

|     |          |          |          |
|-----|----------|----------|----------|
| 699 | 17.83631 | 14.81788 | 9.60614  |
| 700 | 17.91555 | 14.84479 | 9.63855  |
| 701 | 17.90845 | 14.88236 | 9.66606  |
| 702 | 17.95649 | 14.94756 | 9.69663  |
| 703 | 18.03931 | 14.99914 | 9.71959  |
| 704 | 18.04864 | 15.02083 | 9.73287  |
| 705 | 18.11378 | 15.06657 | 9.77743  |
| 706 | 18.14681 | 15.11232 | 9.83657  |
| 707 | 18.1814  | 15.15515 | 9.85266  |
| 708 | 18.25097 | 15.2105  | 9.88785  |
| 709 | 18.27996 | 15.2636  | 9.91609  |
| 710 | 18.35231 | 15.24116 | 9.95628  |
| 711 | 18.3401  | 15.33041 | 9.95798  |
| 712 | 18.41903 | 15.37984 | 10.01881 |
| 713 | 18.50671 | 15.43263 | 10.0319  |
| 714 | 18.47249 | 15.47229 | 10.03742 |
| 715 | 18.56228 | 15.49145 | 10.09365 |
| 716 | 18.5862  | 15.54658 | 10.10307 |
| 717 | 18.6385  | 15.61003 | 10.1443  |
| 718 | 18.67061 | 15.61934 | 10.16386 |
| 719 | 18.72239 | 15.65442 | 10.18769 |
| 720 | 18.72357 | 15.73025 | 10.21393 |
| 721 | 18.78115 | 15.75177 | 10.24896 |
| 722 | 18.82367 | 15.80575 | 10.24012 |
| 723 | 18.85096 | 15.81201 | 10.28049 |
| 724 | 18.91456 | 15.85155 | 10.32653 |
| 725 | 18.94332 | 15.87352 | 10.34232 |
| 726 | 18.99166 | 15.95834 | 10.38608 |
| 727 | 19.04122 | 15.97631 | 10.34934 |
| 728 | 19.06437 | 16.01022 | 10.41388 |
| 729 | 19.10698 | 16.06749 | 10.43559 |
| 730 | 19.12062 | 16.07351 | 10.46314 |
| 731 | 19.19634 | 16.12829 | 10.49909 |
| 732 | 19.26864 | 16.14216 | 10.50657 |
| 733 | 19.22126 | 16.19646 | 10.52636 |
| 734 | 19.32789 | 16.24019 | 10.55621 |
| 735 | 19.35957 | 16.29508 | 10.57592 |
| 736 | 19.3669  | 16.30172 | 10.62616 |
| 737 | 19.41389 | 16.33787 | 10.65201 |
| 738 | 19.43864 | 16.36326 | 10.66868 |
| 739 | 19.48604 | 16.41516 | 10.69359 |
| 740 | 19.51871 | 16.44114 | 10.71139 |
| 741 | 19.5685  | 16.48621 | 10.72114 |
| 742 | 19.59902 | 16.52472 | 10.78162 |
| 743 | 19.60286 | 16.52673 | 10.79164 |
| 744 | 19.64336 | 16.57773 | 10.79948 |
| 745 | 19.64265 | 16.59195 | 10.81446 |
| 746 | 19.71478 | 16.64108 | 10.83459 |
| 747 | 19.76888 | 16.69421 | 10.85537 |
| 748 | 19.7672  | 16.71536 | 10.89056 |
| 749 | 19.78181 | 16.70476 | 10.88633 |
| 354 | 14.15991 | 10.61926 | 7.11779  |
| 355 | 14.12702 | 10.60391 | 7.10605  |

**Produced data for Figure 2a**

| <b>Time (h)</b> | <b>Log (CFU/mL) - LBA</b> | <b>Log (CFU/mL) – LB<sub>2</sub>A</b> | <b>Log (CFU/mL) – LB<sub>4</sub>A</b> |
|-----------------|---------------------------|---------------------------------------|---------------------------------------|
| 0               | 6.12494                   | 6.4776                                | 6.54489                               |
| 1               | 7.21041                   | 7.06769                               | 7.57062                               |
| 3               | 9.34058                   | 9.27766                               | 8.49554                               |
| 6               | 13.13801                  | 12.34812                              | 10.18378                              |
| 24              | 11.99202                  | 11.24485                              | 10.12075                              |

**Produced data for Figure 2b**

| <b>Time (h)</b> | <b>Log (CFU/mL) – LBA</b> | <b>Log (CFU/mL) – LB<sub>2</sub>A</b> | <b>Log (CFU/mL) – LB<sub>4</sub>A</b> |
|-----------------|---------------------------|---------------------------------------|---------------------------------------|
| 1               | 7.21041                   | 7.06769                               | 7.57062                               |
| 3               | 9.34058                   | 9.27766                               | 8.49554                               |
| 6               | 13.13801                  | 12.34812                              | 10.18378                              |

**Produced data for Figure 2c**

| <b>Time (h)</b> | <b>OD600 – LBA</b> | <b>OD600 – LB<sub>2</sub>A</b> | <b>OD600 – LB<sub>4</sub>A</b> |
|-----------------|--------------------|--------------------------------|--------------------------------|
| 1               | 0.206              | 0.207                          | 0.105                          |
| 3               | 2.03               | 1.26                           | 0.54                           |
| 6               | 4.91               | 2.45                           | 1.25                           |
